# Supplementary material for: Occupational environment and ovarian cancer risk
Source: HighWire-hosted journal article supplement (doi:10.1136/oemed-2022-108557), 2023-07-10

## SUPPLEMENTAL MATERIAL

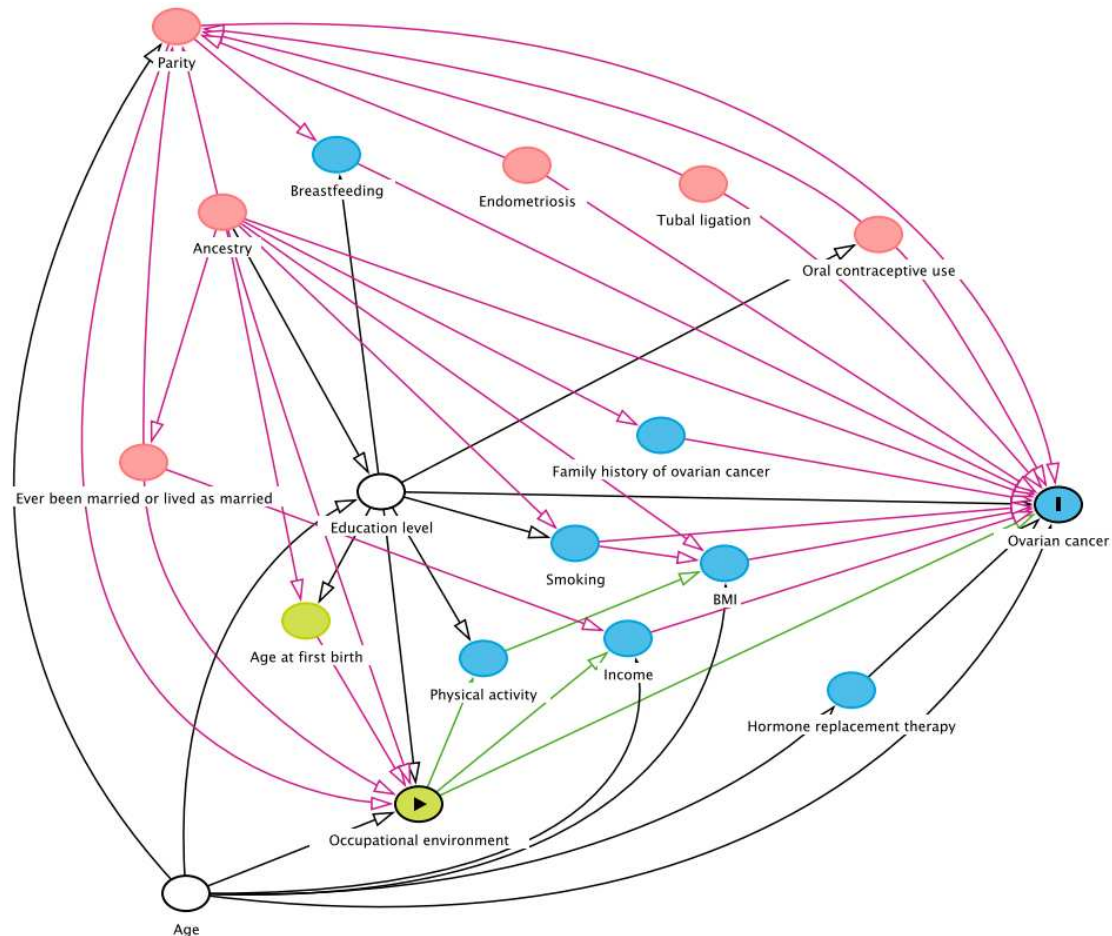

**Figure 1.** Directed acyclic graph for the association between the occupational environment, including employment in an occupation or industry and specific occupational exposures, and ovarian cancer. The minimally sufficient confounder set identified to estimate the total effect of the occupational environment on ovarian cancer included age, education level, ancestry, parity, and ever been married or lived as married.

**Table 1.** Linkage procedures with CANJEM

| Step | ISCO resolution | No. time periods | Time periods                               | Linkage rate <sup>a</sup> |
|------|-----------------|------------------|--------------------------------------------|---------------------------|
| 1    | 5-digits        | 4                | 1930-1949, 1950-1969, 1970-1984, 1985-2005 | 82.9%                     |
| 2    | 5-digits        | 2                | 1930-1969, 1970-2005                       | 7.3%                      |
| 3    | 5-digits        | 1                | 1930-2005                                  | 2.8%                      |
| 4    | 3-digits        | 4                | 1930-1949, 1950-1969, 1970-1984, 1985-2005 | 4.0%                      |
| 5    | 3-digits        | 2                | 1930-1969, 1970-2005                       | 1.5%                      |
| 6    | 3-digits        | 1                | 1930-2005                                  | 0.7%                      |

<sup>a</sup>Refers to the number of jobs linked divided by the total number of jobs in the study population for the specific step. For example, in Step 1, 82.9% of all jobs were linked to CANJEM using 5-digits ISCO and 4 time periods.

As CANJEM contains exposure level information between 1930 to 2005, either the entirety of information was considered as one time period (1930-2005) or the information was subdivided into two time periods (1930-1969, 1970-2005) or four time periods (1930-1949, 1950-1969, 1970-1984, 1985-2005). Given that the PROVAQ study finished recruiting participants in 2016, exposure level information from the nearest time period (i.e., 4 time periods: 1985-2005, 2 time periods: 1970-2005) were utilized for jobs that took place after 2005. Jobs were first linked at 5-digit ISCO codes with four time periods, and if unsuccessful, these jobs would then be sequentially linked with two and then one time periods, followed by 3-digit ISCO codes with four, two, and one time periods. This method enabled the linkage of jobs at higher resolutions (i.e., 5-digit ISCO) and narrower time periods (i.e., four time periods) to produce more precise exposure level estimates, while achieving high linkage rates as jobs were also able to link at lower resolutions and wider time periods (Pasquet R. Methodological considerations of the Canadian job-exposure matrix and the evaluation of the risk of brain cancer in relation to occupational exposure to metallic compounds. [Doctoral thesis]. Montreal, Canada: Université de Montréal; 2018). In the PROVAQ study, 99.3% of all jobs were successfully linked to CANJEM.

**Table 2.** Multivariable ORs (95% CIs) for the association between employment in an industry and ovarian cancer risk, according to employment duration (<10 years, ≥10 years)

| NAICS code | Industry                                                              | Employment duration < 10 years |     |                            | Employment duration ≥ 10 years |     |                            |
|------------|-----------------------------------------------------------------------|--------------------------------|-----|----------------------------|--------------------------------|-----|----------------------------|
|            |                                                                       | Ca                             | Co  | OR <sup>a,b</sup> (95% CI) | Ca                             | Co  | OR <sup>a,b</sup> (95% CI) |
| 11         | Agriculture, Forestry, Fishing and Hunting                            | 3                              | 4   | 0.96 (0.21-4.42)           | 0                              | 4   | -                          |
| 21         | Mining, Quarrying, and Oil and Gas Extraction                         | 1                              | 0   | -                          | 0                              | 0   | -                          |
| 22         | Utilities                                                             | 0                              | 4   | -                          | 0                              | 4   | -                          |
| 23         | Construction                                                          | 6                              | 7   | 1.59 (0.52-4.83)           | 3                              | 2   | 2.79 (0.52-4.83)           |
| 31-33      | Manufacturing                                                         | 51                             | 96  | 0.97 (0.66-1.41)           | 60                             | 78  | 1.30 (0.89-1.91)           |
| 41         | Wholesale Trade                                                       | 14                             | 24  | 1.02 (0.52-2.02)           | 7                              | 11  | 1.19 (0.45-3.14)           |
| 44-45      | Retail Trade                                                          | 94                             | 144 | 1.27 (0.94-1.72)           | 50                             | 56  | 1.59 (1.05-2.39)           |
| 48-49      | Transportation and Warehousing                                        | 29                             | 24  | 2.14 (1.21-3.76)           | 4                              | 21  | 0.30 (0.10-0.90)           |
| 51         | Information and Cultural Industries                                   | 31                             | 54  | 0.98 (0.61-1.57)           | 19                             | 42  | 0.78 (0.44-1.38)           |
| 52         | Finance and Insurance                                                 | 42                             | 63  | 1.22 (0.80-1.86)           | 24                             | 63  | 0.66 (0.40-1.08)           |
| 53         | Real Estate and Rental and Leasing                                    | 20                             | 29  | 1.36 (0.75-2.46)           | 5                              | 15  | 0.67 (0.24-1.89)           |
| 54         | Professional, Scientific and Technical Services                       | 38                             | 79  | 0.95 (0.62-1.44)           | 46                             | 83  | 1.10 (0.74-1.62)           |
| 55         | Management of Companies and Enterprises                               | 1                              | 0   | -                          | 0                              | 0   | -                          |
| 56         | Administrative and Support, Waste Management and Remediation Services | 29                             | 52  | 1.01 (0.63-1.63)           | 11                             | 12  | 1.38 (0.59-3.22)           |
| 61         | Educational Services                                                  | 69                             | 125 | 1.11 (0.80-1.55)           | 54                             | 120 | 1.07 (0.73-1.57)           |
| 62         | Health Care and Social Assistance                                     | 59                             | 143 | 0.72 (0.51-1.01)           | 72                             | 162 | 0.77 (0.56-1.06)           |
| 71         | Arts, Entertainment and Recreation                                    | 26                             | 44  | 1.17 (0.70-1.96)           | 11                             | 20  | 0.87 (0.41-1.87)           |
| 72         | Accommodation and Food Services                                       | 59                             | 93  | 1.05 (0.73-1.51)           | 16                             | 36  | 0.67 (0.36-1.25)           |
| 81         | Other Services (Except Public Administration)                         | 87                             | 145 | 1.10 (0.81-1.48)           | 46                             | 72  | 1.18 (0.79-1.77)           |
| 91         | Public Administration                                                 | 18                             | 59  | 0.55 (0.32-0.95)           | 30                             | 40  | 1.25 (0.75-2.06)           |

<sup>a</sup>Adjusted for age, education level, ancestry, parity, and ever been married or lived as married.

<sup>b</sup>Reference group includes participants who had never been employed in a given industry.

**Table 3.** Multivariable ORs (95% CIs) for the association between ever exposure, duration of exposure, and cumulative exposure to 29 agents and ovarian cancer risk, using participants classified as never or uncertainly exposed as the reference group

| Agent <sup>a</sup>                | Never or uncertainly exposed <sup>b</sup> |     |                          | Ever exposed <sup>c</sup> |     |                          | Duration of exposure |     |                          |           |     |                          | Cumulative exposure |     |                          |      |    |                          |
|-----------------------------------|-------------------------------------------|-----|--------------------------|---------------------------|-----|--------------------------|----------------------|-----|--------------------------|-----------|-----|--------------------------|---------------------|-----|--------------------------|------|----|--------------------------|
|                                   | Ca                                        | Co  | OR <sup>d</sup> (95% CI) | Ca                        | Co  | OR <sup>d</sup> (95% CI) | < 8 years            |     |                          | ≥ 8 years |     |                          | Low                 |     |                          | High |    |                          |
|                                   |                                           |     |                          |                           |     |                          | Ca                   | Co  | OR <sup>d</sup> (95% CI) | Ca        | Co  | OR <sup>d</sup> (95% CI) | Ca                  | Co  | OR <sup>d</sup> (95% CI) | Ca   | Co | OR <sup>d</sup> (95% CI) |
| Cosmetic talc                     | 475                                       | 879 | 1.0 (ref)                | 15                        | 16  | 1.7 (0.8-3.6)            | 11                   | 12  | 1.7 (0.8-4.0)            | 4         | 4   | 1.7 (0.4-6.8)            | 8                   | 11  | 1.4 (0.5-3.5)            | 7    | 5  | 2.5 (0.8-8.0)            |
| Calcium carbonate                 | 435                                       | 765 | 1.0 (ref)                | 55                        | 130 | 1.0 (0.7-1.4)            | 20                   | 42  | 1.0 (0.6-1.7)            | 35        | 88  | 1.0 (0.6-1.5)            | 43                  | 91  | 1.0 (0.7-1.6)            | 12   | 39 | 0.8 (0.4-1.5)            |
| Ammonia                           | 467                                       | 867 | 1.0 (ref)                | 23                        | 28  | 1.4 (0.8-2.5)            | 9                    | 18  | 0.8 (0.4-1.8)            | 14        | 10  | 2.5 (1.1-5.9)            | 10                  | 19  | 0.9 (0.4-1.9)            | 13   | 9  | 2.6 (1.1-6.2)            |
| Hydrogen peroxide                 | 472                                       | 876 | 1.0 (ref)                | 18                        | 19  | 1.7 (0.8-3.2)            | 5                    | 11  | 0.8 (0.3-2.3)            | 13        | 8   | 2.9 (1.2-7.2)            | 8                   | 13  | 1.1 (0.5-2.7)            | 10   | 6  | 2.8 (1.0-7.9)            |
| Hair dust                         | 471                                       | 874 | 1.0 (ref)                | 19                        | 21  | 1.6 (0.8-3.1)            | 5                    | 12  | 0.7 (0.3-2.1)            | 14        | 9   | 2.8 (1.2-6.7)            | 8                   | 14  | 1.1 (0.4-2.6)            | 11   | 7  | 2.7 (1.0-7.1)            |
| Synthetic fibres                  | 456                                       | 849 | 1.0 (ref)                | 34                        | 46  | 1.4 (0.9-2.4)            | 11                   | 19  | 1.2 (0.5-2.6)            | 23        | 27  | 1.6 (0.9-3.0)            | 15                  | 32  | 1.0 (0.5-1.9)            | 19   | 14 | 2.5 (1.2-5.3)            |
| Polyester fibres                  | 466                                       | 861 | 1.0 (ref)                | 24                        | 34  | 1.4 (0.8-2.4)            | 7                    | 16  | 1.0 (0.4-2.4)            | 17        | 18  | 1.7 (0.8-3.5)            | 14                  | 23  | 1.3 (0.6-2.6)            | 10   | 11 | 1.5 (0.6-3.6)            |
| Fabric dust                       | 448                                       | 843 | 1.0 (ref)                | 42                        | 52  | 1.5 (1.0-2.5)            | 15                   | 23  | 1.3 (0.6-2.5)            | 27        | 29  | 1.8 (1.0-3.2)            | 25                  | 36  | 1.4 (0.8-2.4)            | 17   | 16 | 1.9 (0.9-4.0)            |
| Cotton dust                       | 451                                       | 844 | 1.0 (ref)                | 39                        | 51  | 1.5 (0.9-2.4)            | 14                   | 22  | 1.2 (0.6-2.5)            | 25        | 29  | 1.6 (0.9-3.0)            | 21                  | 35  | 1.2 (0.7-2.2)            | 18   | 16 | 2.0 (0.9-4.1)            |
| Wool fibres                       | 479                                       | 877 | 1.0 (ref)                | 11                        | 18  | 1.1 (0.5-2.5)            | 3                    | 10  | 0.6 (0.2-2.3)            | 8         | 8   | 1.8 (0.6-4.8)            | 8                   | 12  | 1.4 (0.5-3.4)            | 3    | 6  | 0.8 (0.2-3.2)            |
| Organic dyes and pigments         | 479                                       | 877 | 1.0 (ref)                | 11                        | 18  | 1.0 (0.5-2.2)            | 3                    | 12  | 0.4 (0.1-1.3)            | 8         | 6   | 2.5 (0.8-7.4)            | 5                   | 12  | 0.7 (0.2-1.9)            | 6    | 6  | 1.8 (0.6-5.8)            |
| Cellulose                         | 456                                       | 847 | 1.0 (ref)                | 34                        | 48  | 1.2 (0.8-1.9)            | 17                   | 30  | 0.9 (0.5-1.7)            | 17        | 18  | 1.7 (0.9-3.4)            | 17                  | 33  | 0.9 (0.5-1.7)            | 17   | 15 | 1.9 (0.9-3.8)            |
| Aliphatic aldehydes               | 426                                       | 798 | 1.0 (ref)                | 64                        | 97  | 1.2 (0.8-1.7)            | 26                   | 52  | 0.9 (0.6-1.5)            | 38        | 45  | 1.5 (0.9-2.5)            | 48                  | 67  | 1.3 (0.9-2.0)            | 16   | 30 | 0.9 (0.5-1.8)            |
| Formaldehyde                      | 441                                       | 818 | 1.0 (ref)                | 49                        | 77  | 1.2 (0.8-1.8)            | 16                   | 41  | 0.7 (0.4-1.3)            | 33        | 36  | 1.7 (1.0-2.9)            | 33                  | 53  | 1.2 (0.7-1.8)            | 16   | 24 | 1.2 (0.6-2.4)            |
| Propellant gases                  | 471                                       | 874 | 1.0 (ref)                | 19                        | 21  | 1.6 (0.8-3.1)            | 5                    | 12  | 0.7 (0.3-2.1)            | 14        | 9   | 2.8 (1.2-6.7)            | 7                   | 14  | 0.9 (0.4-2.3)            | 12   | 7  | 3.0 (1.1-7.7)            |
| Organic solvents                  | 445                                       | 822 | 1.0 (ref)                | 45                        | 73  | 1.1 (0.7-1.6)            | 17                   | 39  | 0.7 (0.4-1.3)            | 28        | 34  | 1.4 (0.8-2.4)            | 31                  | 51  | 1.1 (0.7-1.7)            | 14   | 22 | 1.0 (0.5-2.1)            |
| Aliphatic alcohols                | 453                                       | 820 | 1.0 (ref)                | 37                        | 75  | 0.9 (0.6-1.4)            | 16                   | 36  | 0.8 (0.4-1.4)            | 21        | 39  | 1.1 (0.6-1.8)            | 20                  | 52  | 0.7 (0.4-1.2)            | 17   | 23 | 1.5 (0.8-2.8)            |
| Ethanol                           | 471                                       | 874 | 1.0 (ref)                | 19                        | 21  | 1.6 (0.8-3.1)            | 5                    | 12  | 0.7 (0.3-2.1)            | 14        | 9   | 2.8 (1.2-6.7)            | 7                   | 14  | 0.9 (0.4-2.3)            | 12   | 7  | 2.9 (1.1-7.7)            |
| Isopropanol                       | 457                                       | 840 | 1.0 (ref)                | 33                        | 55  | 1.1 (0.7-1.8)            | 14                   | 31  | 0.9 (0.4-1.6)            | 19        | 24  | 1.5 (0.8-2.8)            | 15                  | 38  | 0.7 (0.4-1.4)            | 18   | 17 | 2.0 (1.0-4.1)            |
| Fluorocarbons                     | 471                                       | 874 | 1.0 (ref)                | 19                        | 21  | 1.6 (0.8-3.1)            | 5                    | 12  | 0.7 (0.3-2.1)            | 14        | 9   | 2.8 (1.2-6.7)            | 7                   | 14  | 0.9 (0.4-2.3)            | 12   | 7  | 2.9 (1.1-7.7)            |
| Alkanes (C5-C17)                  | 476                                       | 879 | 1.0 (ref)                | 14                        | 16  | 1.4 (0.7-2.9)            | 10                   | 11  | 1.4 (0.6-3.5)            | 4         | 5   | 1.3 (0.3-4.9)            | 9                   | 11  | 1.4 (0.6-3.5)            | 5    | 5  | 1.3 (0.4-4.8)            |
| MAHs <sup>e</sup>                 | 475                                       | 884 | 1.0 (ref)                | 15                        | 11  | 2.1 (1.0-4.8)            | 9                    | 9   | 1.5 (0.6-3.9)            | 6         | 2   | 5.2 (1.0-26.5)           | 10                  | 7   | 2.2 (0.8-5.9)            | 5    | 4  | 2.1 (0.5-7.9)            |
| PAHs from any source <sup>e</sup> | 468                                       | 873 | 1.0 (ref)                | 22                        | 22  | 1.6 (0.8-2.9)            | 18                   | 14  | 2.2 (1.0-4.5)            | 4         | 8   | 0.7 (0.2-2.2)            | 16                  | 15  | 1.8 (0.9-3.7)            | 6    | 7  | 1.2 (0.4-3.6)            |
| PAHs from petroleum <sup>e</sup>  | 474                                       | 881 | 1.0 (ref)                | 16                        | 14  | 1.8 (0.9-3.9)            | 14                   | 9   | 2.6 (1.1-6.1)            | 2         | 5   | 0.6 (0.1-3.3)            | 10                  | 9   | 1.9 (0.8-4.8)            | 6    | 5  | 1.8 (0.5-6.0)            |
| Engine emissions                  | 455                                       | 838 | 1.0 (ref)                | 35                        | 57  | 1.2 (0.7-1.8)            | 25                   | 29  | 1.7 (1.0-2.9)            | 10        | 28  | 0.7 (0.3-1.4)            | 27                  | 39  | 1.3 (0.8-2.2)            | 8    | 18 | 0.8 (0.3-1.9)            |
| Cooking fumes                     | 415                                       | 770 | 1.0 (ref)                | 75                        | 125 | 1.0 (0.7-1.4)            | 44                   | 69  | 1.1 (0.7-1.6)            | 31        | 56  | 0.9 (0.6-1.4)            | 59                  | 87  | 1.1 (0.8-1.6)            | 16   | 38 | 0.7 (0.4-1.2)            |
| Cleaning agents                   | 327                                       | 599 | 1.0 (ref)                | 163                       | 296 | 0.9 (0.7-1.2)            | 64                   | 113 | 1.0 (0.7-1.3)            | 99        | 183 | 0.9 (0.7-1.3)            | 107                 | 207 | 0.9 (0.7-1.2)            | 56   | 89 | 1.0 (0.7-1.5)            |
| Biocides                          | 390                                       | 677 | 1.0 (ref)                | 100                       | 218 | 0.8 (0.6-1.0)            | 30                   | 76  | 0.6 (0.4-1.0)            | 70        | 142 | 0.9 (0.6-1.2)            | 58                  | 152 | 0.6 (0.5-0.9)            | 42   | 66 | 1.1 (0.7-1.7)            |
| Bleaches                          | 481                                       | 879 | 1.0 (ref)                | 9                         | 16  | 1.0 (0.4-2.3)            | 2                    | 10  | 0.3 (0.1-1.6)            | 7         | 6   | 2.2 (0.7-6.7)            | 2                   | 11  | 0.3 (0.1-1.5)            | 7    | 5  | 2.5 (0.8-8.1)            |

<sup>a</sup>Agents selected for analysis had at least 15 ever exposed cases and/or 15 ever exposed controls.<sup>b</sup>Participants classified as never exposed to an agent have exclusively worked jobs with a probability of exposure of 0% to the agent and participants classified as uncertainly exposed to an agent have exclusively worked jobs with either a probability of exposure >0- <50% to the agent at any duration or a probability of exposure ≥50% for less than two cumulative years.<sup>c</sup>Participants classified as ever exposed to an agent have ever worked a job with a probability of exposure of ≥50% to the agent for at least two cumulative years.<sup>d</sup>Adjusted for age, education level, ancestry, parity, and ever been married or lived as married.<sup>e</sup>Abbreviations: Mononuclear aromatic hydrocarbons (MAHs), Polycyclic aromatic hydrocarbons (PAHs).

**Table 4.** Heat map displaying pairwise Spearman's correlation coefficients ( $\rho$ ) for the 29 agents<sup>a</sup>

|                                   | Calcium carbonate | Ammonia | Hydrogen peroxide | Hair dust | Synthetic fibres | Polyester fibres | Fabric dust | Cotton dust | Wool fibres | Organic dyes and pigments | Cellulose | Aliphatic aldehydes | Formaldehyde | Propellant gases | Organic solvents | Aliphatic alcohols | Ethanol | Isopropanol | Fluorocarbons | Alkanes (C5-C17) | MAHs <sup>b</sup> | PAHs from any source <sup>b</sup> | PAHs from petroleum <sup>b</sup> | Engine emissions | Cooking fumes | Cleaning agents | Biocides | Bleaches |     |
|-----------------------------------|-------------------|---------|-------------------|-----------|------------------|------------------|-------------|-------------|-------------|---------------------------|-----------|---------------------|--------------|------------------|------------------|--------------------|---------|-------------|---------------|------------------|-------------------|-----------------------------------|----------------------------------|------------------|---------------|-----------------|----------|----------|-----|
| Cosmetic talc                     | 0.0               | 0.8     | 0.8               | 0.6       | 0.1              | 0.0              | 0.1         | 0.1         | 0.1         | -0.1                      | 0.2       | 0.3                 | 0.9          | 0.2              | 0.8              | 1.0                | 0.9     | 0.6         | 0.0           | 0.0              | 0.0               | -0.1                              | 0.0                              | 0.1              | 0.4           | 0.6             | 0.3      |          |     |
| Calcium carbonate                 |                   | -0.2    | -0.1              | -0.1      | -0.1             | -0.1             | -0.1        | -0.1        | -0.1        | -0.2                      | -0.4      | -0.3                | -0.1         | 0.1              | 0.1              | -0.1               | -0.2    | -0.1        | -0.1          | -0.1             | -0.1              | -0.1                              | -0.1                             | -0.3             | 0.0           | 0.0             | -0.2     | -0.1     |     |
| Ammonia                           |                   |         | 0.9               | 0.9       | 0.2              | 0.1              | 0.3         | 0.2         | 0.0         | 0.9                       | 0.1       | 0.6                 | 0.7          | 1.0              | 0.7              | 0.7                | 0.9     | 0.8         | 0.9           | 0.3              | 0.5               | 1.0                               | 0.7                              | 0.3              | 0.5           | 0.6             | 0.5      | 1.0      |     |
| Hydrogen peroxide                 |                   |         |                   | 1.0       | 0.0              | 0.0              | 0.0         | 0.0         | 0.0         | 0.9                       | -0.1      | 0.3                 | 0.4          | 1.0              | 0.3              | 0.7                | 1.0     | 0.8         | 1.0           | -0.1             | 0.0               | 0.2                               | 0.0                              | 0.0              | 0.0           | 0.3             | 0.4      | 1.0      |     |
| Hair dust                         |                   |         |                   |           | 0.0              | 0.0              | 0.0         | 0.0         | 0.0         | 0.9                       | 0.0       | 0.3                 | 0.4          | 1.0              | 0.3              | 0.6                | 1.0     | 0.7         | 1.0           | 0.0              | 0.0               | 0.2                               | 0.0                              | 0.0              | 0.0           | 0.3             | 0.2      | 0.9      |     |
| Synthetic fibres                  |                   |         |                   |           |                  | 1.0              | 1.0         | 1.0         | 1.0         | 0.1                       | 0.3       | 0.8                 | 0.9          | 0.2              | 0.4              | 0.0                | 0.0     | 0.0         | 0.0           | 0.7              | 0.6               | 0.6                               | 0.6                              | 0.1              | 0.2           | 0.3             | 0.0      | -0.1     |     |
| Polyester fibres                  |                   |         |                   |           |                  |                  | 1.0         | 1.0         | 1.0         | 0.0                       | 0.1       | 0.7                 | 0.8          | 0.2              | 0.2              | 0.0                | 0.0     | 0.0         | 0.0           | 0.4              | 0.4               | 0.4                               | 0.5                              | 0.2              | 0.1           | 0.1             | -0.1     | 0.0      |     |
| Fabric dust                       |                   |         |                   |           |                  |                  |             | 1.0         | 1.0         | 0.1                       | 0.3       | 0.8                 | 0.9          | 0.2              | 0.6              | 0.2                | 0.0     | 0.2         | 0.0           | 0.6              | 0.6               | 0.7                               | 0.7                              | 0.1              | 0.3           | 0.5             | 0.3      | 0.0      |     |
| Cotton dust                       |                   |         |                   |           |                  |                  |             |             | 1.0         | 0.1                       | 0.3       | 0.8                 | 0.9          | 0.1              | 0.5              | 0.2                | 0.0     | 0.2         | 0.0           | 0.7              | 0.7               | 0.7                               | 0.8                              | 0.1              | 0.3           | 0.5             | 0.3      | 0.0      |     |
| Wool fibres                       |                   |         |                   |           |                  |                  |             |             |             | 0.0                       | 0.0       | 0.6                 | 0.7          | 0.1              | 0.1              | 0.1                | 0.0     | 0.0         | 0.0           | 0.3              | 0.2               | 0.3                               | 0.4                              | 0.2              | 0.1           | 0.2             | 0.0      | 0.0      |     |
| Organic dyes and pigments         |                   |         |                   |           |                  |                  |             |             |             |                           | 0.3       | 0.5                 | 0.7          | 1.0              | 0.8              | 0.6                | 0.9     | 0.6         | 0.9           | 0.7              | 0.8               | 0.7                               | 0.9                              | 0.1              | 0.0           | 0.3             | 0.2      | 1.0      |     |
| Cellulose                         |                   |         |                   |           |                  |                  |             |             |             |                           |           | 0.3                 | 0.3          | 0.0              | 0.5              | 0.1                | 0.0     | 0.0         | 0.0           | 0.7              | 0.7               | 0.7                               | 0.8                              | 0.4              | 0.2           | 0.0             | 0.1      | 0.0      |     |
| Aliphatic aldehydes               |                   |         |                   |           |                  |                  |             |             |             |                           |           |                     | 1.0          | 0.8              | 0.8              | 0.6                | 0.4     | 0.6         | 0.3           | 0.4              | 0.4               | 0.9                               | 0.6                              | 0.6              | 0.5           | 0.6             | 0.6      | 0.4      |     |
| Formaldehyde                      |                   |         |                   |           |                  |                  |             |             |             |                           |           |                     |              |                  | 0.9              | 0.7                | 0.7     | 0.4         | 0.5           | 0.4              | 0.8               | 0.6                               | 0.3                              | 0.5              | 0.7           | 0.7             | 0.5      |          |     |
| Propellant gases                  |                   |         |                   |           |                  |                  |             |             |             |                           |           |                     |              |                  |                  | 0.6                | 0.8     | 1.0         | 0.9           | 1.0              | 0.0               | 0.0                               | 0.5                              | 0.2              | 0.1           | 0.6             | 0.7      | 1.0      |     |
| Organic solvents                  |                   |         |                   |           |                  |                  |             |             |             |                           |           |                     |              |                  |                  |                    | 0.8     | 1.0         | 0.9           | 1.0              | 0.0               | 0.0                               | 0.8                              | 0.6              | 0.2           | 0.4             | 0.6      | 0.7      | 0.4 |
| Aliphatic alcohols                |                   |         |                   |           |                  |                  |             |             |             |                           |           |                     |              |                  |                  |                    |         | 0.7         | 1.0           | 0.6              | 0.1               | 0.1                               | 0.3                              | 0.2              | 0.1           | 0.3             | 0.9      | 0.9      | 0.6 |
| Ethanol                           |                   |         |                   |           |                  |                  |             |             |             |                           |           |                     |              |                  |                  |                    |         |             | 0.7           | 1.0              | 0.0               | 0.0                               | 0.3                              | 0.1              | 0.1           | 0.0             | 0.3      | 0.3      | 1.0 |
| Isopropanol                       |                   |         |                   |           |                  |                  |             |             |             |                           |           |                     |              |                  |                  |                    |         |             |               | 0.7              | 0.0               | 0.0                               | 0.4                              | 0.2              | 0.2           | 0.4             | 0.9      | 1.0      | 0.7 |
| Fluorocarbons                     |                   |         |                   |           |                  |                  |             |             |             |                           |           |                     |              |                  |                  |                    |         |             |               |                  | 0.0               | 0.0                               | 0.2                              | 0.1              | 0.1           | 0.0             | 0.3      | 0.2      | 0.9 |
| Alkanes (C5-C17)                  |                   |         |                   |           |                  |                  |             |             |             |                           |           |                     |              |                  |                  |                    |         |             |               |                  |                   | 1.0                               | 0.9                              | 0.8              | 0.6           | 0.1             | 0.1      | 0.0      | 0.0 |
| MAHs <sup>b</sup>                 |                   |         |                   |           |                  |                  |             |             |             |                           |           |                     |              |                  |                  |                    |         |             |               |                  |                   |                                   | 0.9                              | 0.8              | 0.2           | 0.1             | 0.2      | 0.1      | 0.0 |
| PAHs from any source <sup>b</sup> |                   |         |                   |           |                  |                  |             |             |             |                           |           |                     |              |                  |                  |                    |         |             |               |                  |                   |                                   |                                  | 1.0              | 0.9           | 0.8             | 0.5      | 0.2      | 0.0 |
| PAHs from petroleum <sup>b</sup>  |                   |         |                   |           |                  |                  |             |             |             |                           |           |                     |              |                  |                  |                    |         |             |               |                  |                   |                                   |                                  |                  | 0.9           | 0.5             | 0.3      | 0.1      | 0.0 |
| Engine emissions                  |                   |         |                   |           |                  |                  |             |             |             |                           |           |                     |              |                  |                  |                    |         |             |               |                  |                   |                                   |                                  |                  |               | 0.3             | 0.2      | 0.2      | 0.0 |
| Cooking fumes                     |                   |         |                   |           |                  |                  |             |             |             |                           |           |                     |              |                  |                  |                    |         |             |               |                  |                   |                                   |                                  |                  |               |                 | 0.7      | 0.4      | 0.0 |
| Cleaning agents                   |                   |         |                   |           |                  |                  |             |             |             |                           |           |                     |              |                  |                  |                    |         |             |               |                  |                   |                                   |                                  |                  |               |                 |          | 0.8      | 0.4 |
| Biocides                          |                   |         |                   |           |                  |                  |             |             |             |                           |           |                     |              |                  |                  |                    |         |             |               |                  |                   |                                   |                                  |                  |               |                 |          |          | 0.3 |

<sup>a</sup>Pairwise Spearman's correlation coefficients were calculated for cumulative exposure to agents and for all study participants.

<sup>b</sup>Abbreviations: Mononuclear aromatic hydrocarbons (MAHs), Polycyclic aromatic hydrocarbons (PAHs).

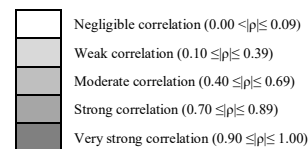

Supplement: oemed-2022-108557supp001_data_supplement.pdf [file oemed-2022-108557supp001_data_supplement.pdf]
